# Supplementary material
Source: publisher site journal article supplement (https://www.dovepress.com/get_supplementary_file.php?f=360346.docx)
Supplement: Supplementary file 2 [file get_supplementary_file.php]

Supplementary **Figure S1**


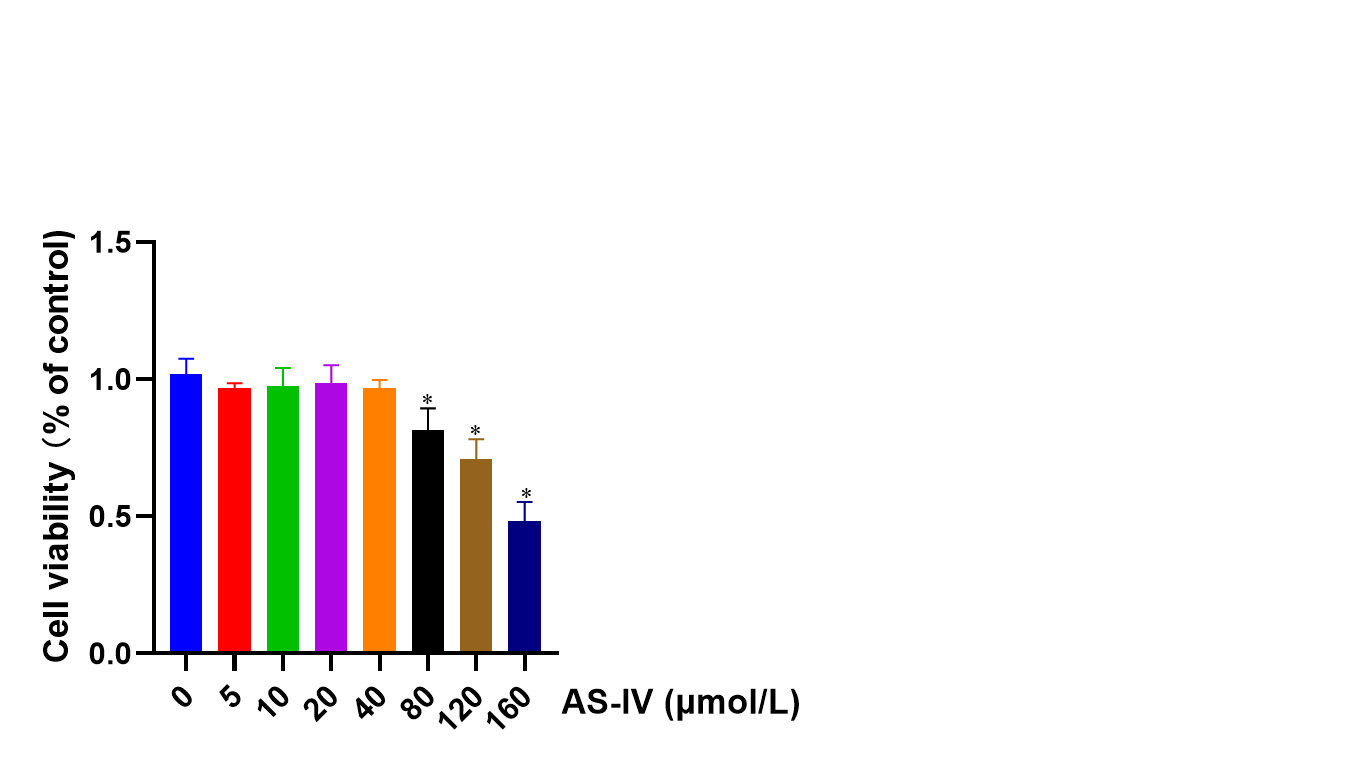


**Figure S1:** Cell viability of HK-2 cells treated with different concentrations of AS-IV. Data are expressed as the mean ± SD. *P < 0.05 vs. the 0 μmol /L AS-IV control group (n=6).
